# Supplementary material for: Training non-physician anaesthetists in sub-Saharan Africa: a qualitative investigation of providers’ perspectives
Source: PubMed Central journal article supplement — BMJ Open. 2019 Mar 7;9(3):e026218. doi: 10.1136/bmjopen-2018-026218 (PMC6429866; doi:10.1136/bmjopen-2018-026218), 2019-03-07
Supplement: bmjopen-2018-026218supp001.pdf [file bmjopen-2018-026218supp001.pdf]

## **SUPPLEMENTARY MATERIAL**

### **Interview topic guide**

Preliminary information and checks:

- introductions and confirmation of interviewee's name
- recap purpose of the interview, optional nature, able to withdraw data
- confirm still willing to proceed as per consent form, timeframe
- confirm consents to be recorded

Opening questions:

- role/s and experience of the interviewee
- current and previous place/s of work, what is it like?
- local anaesthesia providers: who, how many, what training?
- what kind of experience / knowledge do they have about the wider situation in their country?

Training NPAPs:

- personal experience (NPAPs) or observation/involvement (others)
- what do they recall about training?
  - structure of their training
  - memorable events / experiences
  - content of training

The working practice of NPAs (with a view to then discussing the transition between training and working)

- either personal experience (NPAPs) or working with them (others)
- caseload and nature
- work outside the OR
- factors improving safety and quality of care, and barriers
- job satisfaction / dissatisfaction and reasons

Transition between training and working:

- recall the first day of work (if NPA)
- how well prepared were they? Did they have to adjust?
- what do they wish they knew then, that they know now?
- what is it like working with a newly qualified NPA (for non-NPAs)?

Physician and non-physician anaesthetists (if not already covered)

- Experience working together during NPA training?
- Experience working together after training?

Aspirations:

- How would you change NPA training and why?

## Coding/analytic strategy

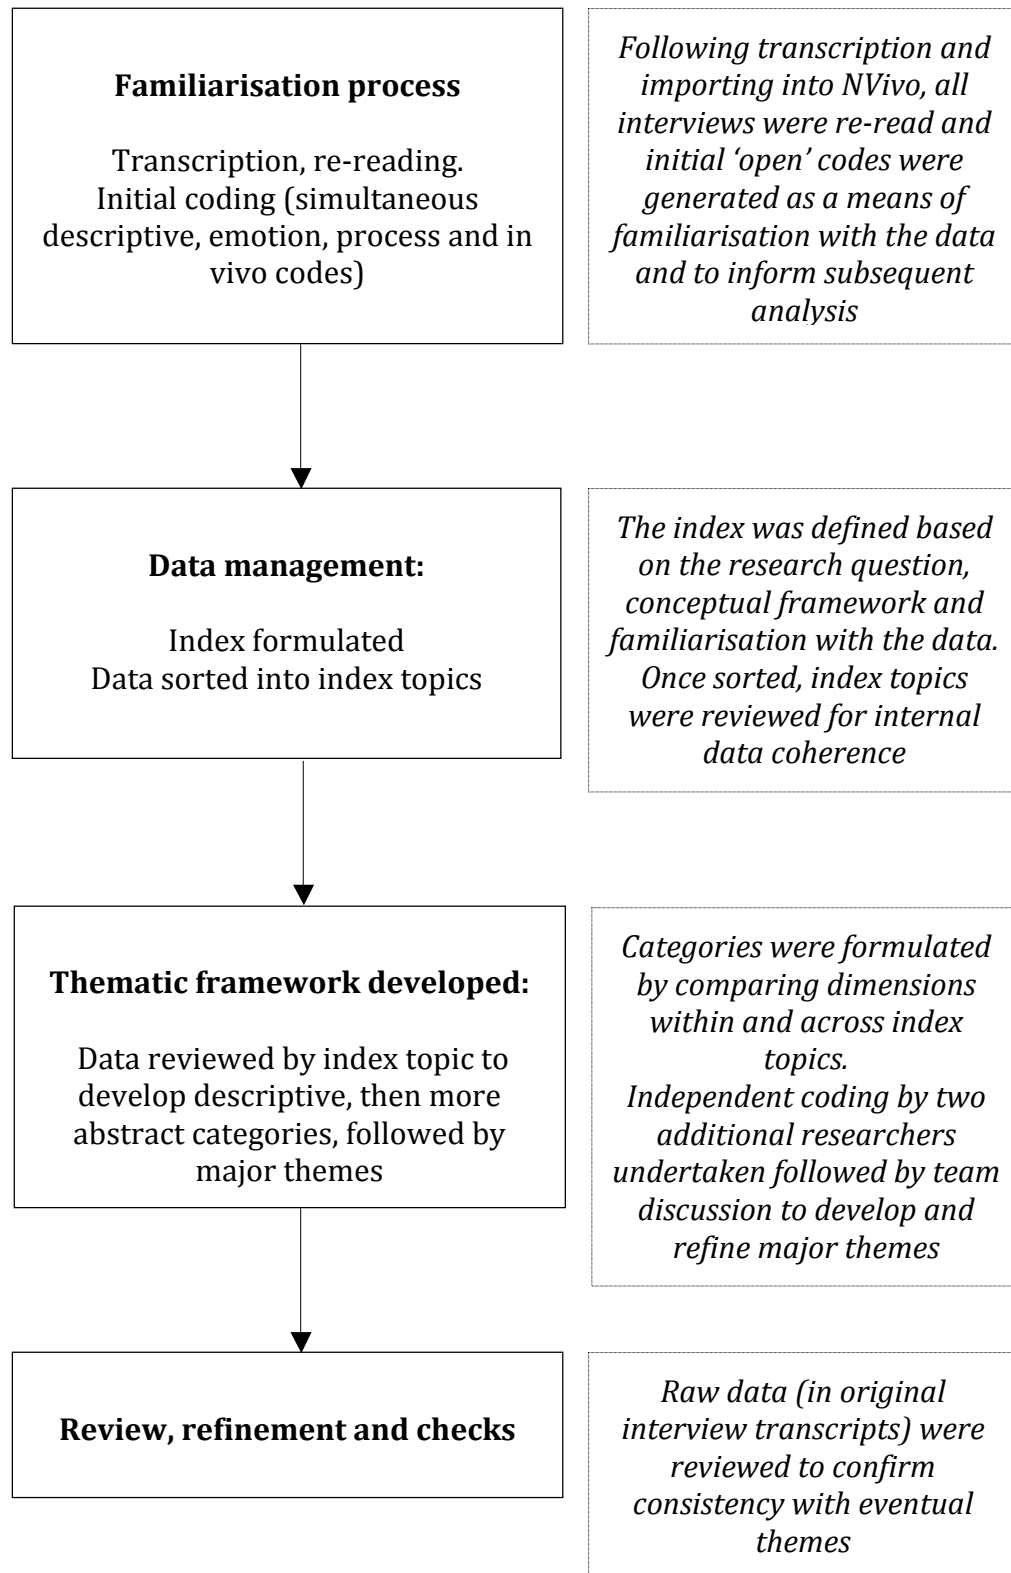

The following tables show the index topics used for early data management and the distribution of coder:source.

Table 1: Index created for data management

| <b>Index topic</b>                   | <b>Index subtopic</b>                                                                               |
|--------------------------------------|-----------------------------------------------------------------------------------------------------|
| 1. How current training is delivered | 1.1 Getting into training<br>1.2 Training structures<br>1.3 Experiences in training<br>1.4 Trainers |
| 2. Transitioning to practice         |                                                                                                     |
| 3. Working after training            | 3.1 Doing the job<br>3.2 Referral and supervision<br>3.3 CME and career development                 |
| 4. Relationships across cadres       | 4.1 NPAs and PAs<br>4.2 Surgeons and NPAs<br>4.3 Other NPA cadres                                   |
| 5. Aspirations                       |                                                                                                     |
| 6. International interactions        | 6.1 International involvement in training<br>6.2 Countries as comparators<br>6.3 Other              |

Table 2: Coding personnel

| <b>Coder</b> | <b>Transcripts coded</b> |
|--------------|--------------------------|
| LB           | SL1-2, S2, U1-5          |
| FB           | SL1-3, S1-4, S6          |
| HE           | SL1-3, S1-6, U1-6        |
| SKI          | SL3, S1, S5, U4-6        |
| VT           | S3-6, U1-3, U6           |

## Recruitment flow and participant characteristics

Table 3: Recruitment by country

|                                  | Sierra Leone   | Somaliland | Uganda         |
|----------------------------------|----------------|------------|----------------|
| Approached                       | 9 (3N, 2P, 4S) | 8 (7N, 1S) | 8 (5N, 2P, 1S) |
| Declined                         | 1 (1S)         | 0          | 1 (1N)         |
| Did not respond                  | 4 (2N, 1P, 1S) | 1 (1N)     | 1 (1N)         |
| Accepted but unable to interview | 1 (1S)         | 1 (1N)     | 0              |
| Accepted and interviewed         | 3 (1N, 1P, 1S) | 6 (5N, 1S) | 6 (3N, 2P, 1S) |

*N: non-physician anaesthetist; P: physician anaesthetist; S: surgeon*

Table 4: Gender of participants

|        | Sierra Leone | Somaliland | Uganda |
|--------|--------------|------------|--------|
| Male   | 2            | 2          | 4      |
| Female | 1            | 4          | 2      |

One participant was previously known to the interviewer as a professional colleague. Seven were known to current or previous colleagues of the interviewer (but had no prior direct relationship with the interviewer). Seven were recruited through two or more intermediaries.
